# Supplementary material for: The Pertinence of Microwave Irradiated Coconut Shell Bio-Sorbent for Wastewater Decolourization: Structural Morphology and Adsorption Optimization Using the Response Surface Method (RSM)
Source: MDPI journal article supplement (doi:10.3390/ijerph15102200), 2018-10-09
Supplement: s1 [file s1]

**Supplementary Data**

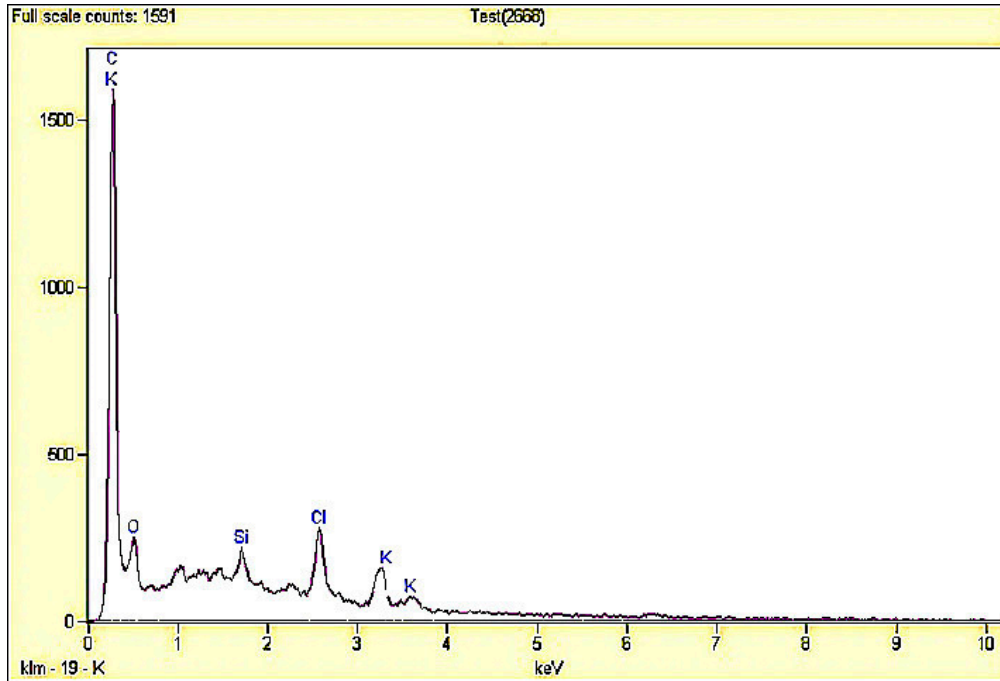

**Figure S1.** EDX analysis showing the elemental composition in the non-pretreated CSAC.

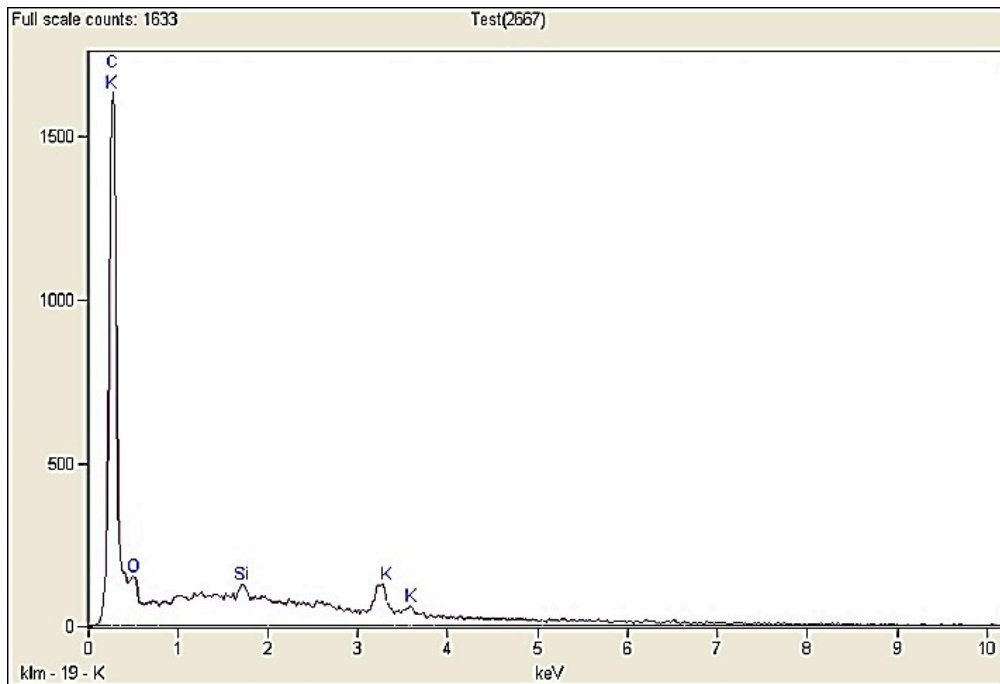

**Figure S2.** EDX analysis showing the elemental composition in the microwave pretreated CSAC.

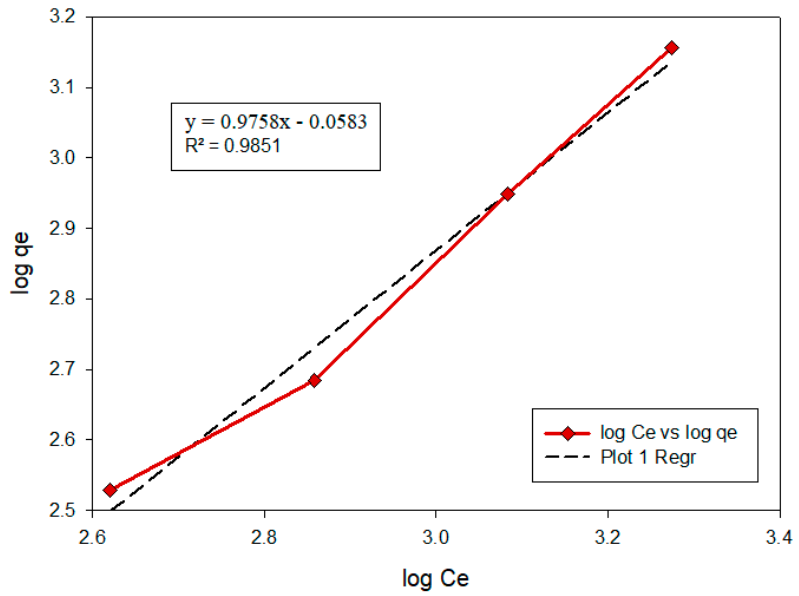

Figure S3. Freundlich isotherm model of colour adsorption onto the pretreated CSAC at 27 °C.

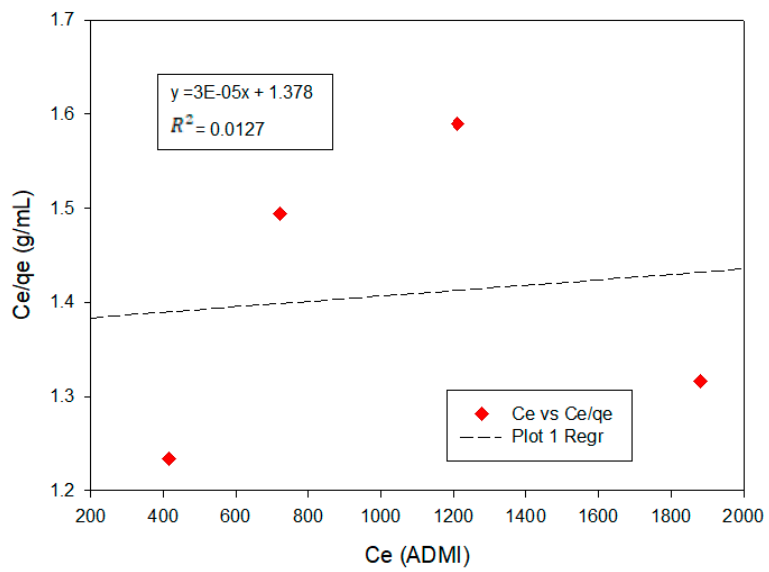

Figure S4. Langmuir isotherm model of colour adsorption onto the pretreated CSAC at 27 °C.
